# Supplementary material
Source: publisher site journal article supplement (https://www.dovepress.com/article/supplementary_file/588278/588278%20Revised%20Supplementary%20Material.docx)
Supplement: Supplementary file 1 [file 588278%20Revised%20Supplementary%20Material.docx]

Supplementary Table S1 Baseline bhavioral characteristics, medication use, and disease history of the study population

| Variant | Total | Metabolic State | | P value |
| --- | --- | --- | --- | --- |
|  | 23148 | MetS-positive (7479) | MetS-negative (15582) |  |
| Smoking, n (%) | 7620 (32.92) | 2996 (40.06) | 4624 (29.68) | <0.001 |
| Drinking, n (%) | 8409 (36.33) | 3192 (42.68) | 5217 (33.48) | <0.001 |
| Sleep quality, n (%) | 12478 (53.91) | 3834 (51.26) | 8644 (55.47) | <0.001 |
| Medication history |  |  |  |  |
| Antihypertensive, n (%) | 1825 (7.90) | 1041 (13.90) | 784 (5.03) | <0.001 |
| Antidiabetic, n (%) | 656 (2.83) | 385 (5.14) | 271 (1.74) | <0.001 |
| Lipid-lowering drug, n (%) | 320 (1.38) | 173 (2.31) | 147 (0.943) | <0.001 |
| Personal history of diseases |  |  |  |  |
| HBP, n (%) | 1015 (4.38) | 882 (11.80) | 133 (0.85) | <0.001 |
| DM, n (%) | 214 (0.92) | 199 (2.66) | 15 (0.10) | <0.001 |
| Fatty liver, n (%) | 152 (0.66) | 98 (1.31) | 53 (0.34) | <0.001 |

Notes: MetS: Metabolic syndrom, HBP: High blood pressure; DM: Diabetes mellitus.

Supplementary Table S2. Baseline characteristics of males and females

| Variables | Sex | | P value |
| --- | --- | --- | --- |
| Males (15745) | Females (7403) |  |
| Age (yr) | 47.00 (40.00-54.00) | 46.00 (39.00-52.00) | <0.001 |
| Smoking, n (%) | 7280 (46.20) | 353 (4.77) | <0.001 |
| Drinking, n (%) | 7727 (49.10) | 699 (9.44) | <0.001 |
| HBP, n (%) | 1466 (9.31) | 454 (6.13) | <0.001 |
| DM, n (%) | 676 (4.29) | 121 (1.63) | <0.001 |
| Medication history |  |  |  |
| Antihypertensive, n (%) | 1380 (8.76) | 445 (6.01) | <0.001 |
| Antidiabetic, n (%) | 541 (3.44) | 115 (1.55) | <0.001 |
| Lipid-lowering drugs, n (%) | 257 (1.63) | 63 (0.85) | <0.001 |
| Metabolic index |  |  |  |
| BMI (kg/m2) | 25.31 (23.44-27.32) | 23.02 (13.00-45.00) | <0.001 |
| WC (cm) | 89.00 (84.00-94.00) | 77.00 (72.00-82.00) |  |
| SBP (mmHg) | 125.00 (115.00-135.00) | 119.10 (78.00-206.00) | <0.001 |
| DBP (mmHg) | 78.00 (71.00-86.00) | 71.47 (39.00-129.00) | <0.001 |
| TG (mmol/L) | 1.76 (1.19-2.72) | 1.13 (0.81-1.65) | <0.001 |
| TC (mmol/L) | 5.06 (4.46-5.68) | 5.00 (4.39-5.67) | <0.001 |
| HDL-C (mmol/L) | 1.19 (1.06-1.35) | 1.44 (1.27-1.64) | <0.001 |
| LDL-C (mmol/L) | 2.83 (2.29-3.36) | 2.84 (2.35-3.40) | <0.001 |
| Cr (µmol/L) | 81.00 (74.00-89.00) | 58.00 (53.00-64.00) | <0.001 |
| UA (µmol/L) | 383.50 (335.00-436.00) | 279.00 (244.00-320.00) | <0.001 |
| FBG (mmol/L) | 5.40 (5.03-5.91) | 5.20 (4.88-5.57) | <0.001 |
| HbA1c (%) | 5.50 (5.30-5.80) | 5.50 (5.30-5.70) | <0.001 |
| TyG | 1.59 (1.17-2.06) | 1.09 (0.72-1.51) | <0.001 |
| Biomarkers |  |  |  |
| hs-CRP (mg/L) | 1.27 (0.76-2.10) | 1.00 (0.60-1.80) | <0.001 |

Notes: HBP: Hypertension; DM: Diabetes mellitus; BMI: Body mass index; WC: Waist circumference; SBP: Systolic blood pressure; DBP: Diastolic blood pressure; TC: Total cholesterol; TG: Triglycerides; HDL-C: High-density lipoprotein cholesterol; LDL-C: Low-density lipoprotein cholesterol; FBG: Fasting blood glucose; HbA1c: Glycosylated hemoglobin; Cr: Creatinine; UA: Blood uric acid; TyG: Triglyceride-glucose index; hs-CRP: high-sensitivity C-reactive protein.

Supplementary Table S3 Baseline characteristics of participants with or without MetS in males and females

| Variables | Males (15745) | | P value | Females (15745) | | P value |
| --- | --- | --- | --- | --- | --- | --- |
| MetS-negative  (5962) | MetS-positive  (9783) |  | MetS-negative  (1517) | MetS-positive  (5799) |  |
| Age (yr) | 47.00 (40.00-54.00) | 49.00 (42.00-54.00) | <0.001 | 46.00 (39.00-52.00) | 54.00 (48.00-61.00) | <0.001 |
| Smoking, n (%) | 2936 (49.25) | 4332 (44.28) | <0.001 | 60 (3.96) | 292 (5.04) | <0.001 |
| Drinking, n (%) | 3091 (51.85) | 4383 (44.80) | <0.001 | 101 (6.66) | 595 (10.26) | <0.001 |
| HBP, n (%) | 851 (14.27) | 609 (6.23) | <0.001 | 252 (16.61) | 201 (3.47) | <0.001 |
| DM, n (%) | 396 (6.64) | 274 (2.80) | <0.001 | 78 (5.14) | 41 (0.71) | <0.001 |
| Medication history |  |  |  |  |  |  |
| Antihypertensive, n (%) | 786 (13.18) | 594 (6.07) | <0.001 | 287 (18.92) | 158 (2.72) | <0.001 |
| Antidiabetic, n (%) | 307 (5.15) | 234 (2.39) | <0.001 | 78 (5.14) | 37 (0.64) | <0.001 |
| Lipid-lowering drugs, n (%) | 139 (2.33) | 118 (1.21) | <0.001 | 37 (2.44) | 26 (0.45) | <0.001 |
| Metabolic index |  |  |  |  |  |  |
| BMI (kg/m2) | 24.29 (22.68-25.96) | 24.32 (15.00-46.00) | <0.001 | 25.67 (18.00-35.00) | 25.23 (23.54-27.17) | <0.001 |
| WC (cm) | 86.00  (81.00-89.00) | 94.00 (90.00-98.00) | <0.001 | 75.00 (71.00-79.00) | 85.00 (81.00-89.00) | <0.001 |
| SBP (mmHg) | 120.00 (112.00-128.00) | 132.00 (122.00-141.00) | <0.001 | 112.00 (104.00-123.00) | 134.00 (121.00-146.00) | <0.001 |
| DBP (mmHg) | 75.00  (68.00-81.00) | 84.00 (76.00-90.00) | <0.001 | 68.00 (62.00-75.00) | 79.00 (71.00-87.00) | <0.001 |
| TG (mmol/L) | 1.40 (1.03-1.98) | 2.60 (1.92-3.83) | <0.001 | 1.02 (0.76-1.39) | 2.00 (1.49-2.66) | <0.001 |
| TC (mmol/L) | 4.99 (4.42-5.60) | 5.15 (4.56-5.84) | <0.001 | 4.94 (4.35-5.60) | 5.22 (4.57-6.01) | <0.001 |
| HDL-C (mmol/L) | 1.25 (1.13-1.41) | 1.07 (0.97-1.22) | <0.001 | 1.49 (1.33-1.69) | 1.39 (1.12-1.39) | <0.001 |
| LDL-C (mmol/L) | 2.91 (2.40-3.41) | 2.67 (2.06-3.23) | <0.001 | 2.83 (2.35-3.37) | 2.88 (2.34-3.50) | 0.181 |
| Cr (µmol/L) | 81.00 (74.00-89.00) | 81.00 (73.00-89.00) | 0.076 | 58.00 (53.00-64.00) | 58.00 (53.00-65.00) | 0.003 |
| UA (µmol/L) | 372.00 (326.00-422.00) | 405.00 (355.00-459.00) | <0.001 | 271.00 (239.00-309.00) | 317.00 (274.00-359.00) | <0.001 |
| FBG (mmol/L) | 5.23 (4.93-5.56) | 5.84 (5.39-6.51) | <0.001 | 5.11 (4.83-5.40) | 5.80 (5.37-6.30) | <0.001 |
| HbA1c (%) | 5.50 (5.30-5.70) | 5.70 (5.50-6.10) | <0.001 | 5.40 (5.20-5.60) | 5.80 (5.37-6.30) | <0.001 |
| TyG | 1.32 (0.99-1.67) | 2.05 (1.71-2.47) | <0.001 | 0.95 (0.64-1.29) | 1.75 (1.48-2.09) | <0.001 |
| Biomarkers |  |  |  |  |  |  |
| hs-CRP (mg/L) | 1.10 (0.66-1.80) | 1.61 (1.00-2.53) | <0.001 | 0.88 (0.50-1.53) | 1.70 (1.05-2.70) | <0.001 |

Notes: MetS: Metabolic syndrome; HBP: Hypertension; DM: Diabetes mellitus; BMI: Body mass index; WC: Waist circumference; SBP: Systolic blood pressure; DBP: Diastolic blood pressure; TC: Total cholesterol; TG: Triglycerides; HDL-C: High-density lipoprotein cholesterol; LDL-C: Low-density lipoprotein cholesterol; FBG: Fasting blood glucose; HbA1c: Glycosylated hemoglobin; Cr: Creatinine; UA: Blood uric acid; TyG: Triglyceride-glucose index; hs-CRP: high-sensitivity C-reactive protein.

Supplementary Table S4 Results of multicollinearity analysis

| Covariates | All participants | | Males | | Females | |
| --- | --- | --- | --- | --- | --- | --- |
| Tolerance | VIF | Tolerance | VIF | Tolerance | VIF |
| Age (yr) | 0.77 | 1.30 | 0.83 | 1.20 | 0.54 | 1.84 |
| Smoking, n (%) | 0.72 | 1.38 | 0.89 | 1.12 | 0.95 | 1.05 |
| Drinking, n (%) | 0.73 | 1.37 | 0.87 | 1.15 | 0.94 | 1.06 |
| HBP, n (%) | 0.98 | 1.02 | 0.99 | 1.01 | 0.96 | 1.04 |
| DM, n (%) | 0.39 | 2.56 | 0.40 | 2.53 | 0.38 | 2.66 |
| BMI (kg/m2) | 0.22 | 4.64 | 0.24 | 4.23 | 0.27 | 3.75 |
| WC (cm) | 0.17 | 5.93 | 0.23 | 4.28 | 0.24 | 4.17 |
| SBP (mmHg) | 0.25 | 4.00 | 0.27 | 3.73 | 0.22 | 4.61 |
| DBP (mmHg) | 0.29 | 3.42 | 0.30 | 3.31 | 0.33 | 3.00 |
| TG (mmol/L) | 0.13 | 7.95 | 0.12 | 8.33 | 0.18 | 5.62 |
| TC (mmol/L) | 0.07 | 14.74 | 0.08 | 13.05 | 0.05 | 20.08 |
| HDL-C (mmol/L) | 0.30 | 3.34 | 0.39 | 2.57 | 0.29 | 3.46 |
| LDL-C (mmol/L) | 0.09 | 10.91 | 0.10 | 10.02 | 0.07 | 13.96 |
| Cr (µmol/L) | 0.73 | 1.37 | 0.95 | 1.06 | 0.84 | 1.19 |
| UA (µmol/L) | 0.57 | 1.77 | 0.81 | 1.23 | 0.73 | 1.37 |
| FBG (mmol/L) | 0.23 | 4.44 | 0.20 | 4.93 | 0.33 | 3.05 |
| HbA1c (%) | 0.25 | 4.02 | 0.23 | 4.38 | 0.34 | 2.92 |
| TyG | 0.16 | 6.31 | 0.16 | 6.28 | 0.19 | 5.29 |

Notes: VIF: Variance inflation factor; BMI: Body mass index; WC: Waist circumference; SBP: Systolic blood pressure; DBP: Diastolic blood pressure; HBP: Hypertension; TC: Total cholesterol; TG: Triglycerides; HDL-C: High-density lipoprotein cholesterol; LDL-C: Low-density lipoprotein cholesterol; FBG: Fasting blood glucose; HbA1c: Glycosylated hemoglobin; Cr: Creatinine; UA: Blood uric acid; TyG: Triglyceride-glucose index.

Supplementary Table S5 Hs-CRP and the components of MetS

|  | WC | | SBP/DBP | | FBG | | HDL-C | | TG | |
| --- | --- | --- | --- | --- | --- | --- | --- | --- | --- | --- |
|  | No | Yes | No | Yes | No | Yes | No | Yes | No | Yes |
|  | n=13396 | n=9752 | n=14488 | n=8660 | n=15691 | n=7477 | n=16105 | n=7043 | n=13257 | n=9891 |
| hs-CRP (mg/L) | 0.93  (0.57-1.60) | *1.54 (0.92-2.43) | 1.05 (0.60-1.80) | *1.40 (0.80-2.28) | 1.07 (0.61-1.81) | *1.39  (0.80-2.30) | 1.06  (0.60-1.80) | *1.43 (0.85-2.34) | 0.98  (0.59-1.70) | *1.45  (0.90-2.33) |

Notes: Values were given as median (interquartile range).

Abbreviations: WC: Waist circumference; SBP: Systolic blood pressure; DBP: Diastolic blood pressure; TG: Triglycerides; HDL-C: High-density lipoprotein cholesterol; FBG: Fasting blood glucose; hs-CRP: High-sensitivity C-reactive protein.

* Indicate statistically significant differences from the “No” group (*p < 0.05).

Supplementary Table S6 Correlation analysis between hs-CRP biomarkers and clinical parameters

|  | Age | BMI | WC | SBP | DBP | TG | TC | HDL-C | LDL-C | FBG | METS score | Cr | UA | HbA1c | TyG | Sleep quality | hs - CRP |
| --- | --- | --- | --- | --- | --- | --- | --- | --- | --- | --- | --- | --- | --- | --- | --- | --- | --- |
| Age | 1 | -0.054 | 0.046 | 0.31 | 0.0019 | -0.11 | -0.006 | 0.099 | 0.064 | 0.11 | 0.099 | 0.037 | -0.027 | 0.16 | -0.045 | -0.07 | 0.041 |
| BMI |  | 1 | 0.85 | 0.21 | 0.31 | 0.22 | 0.016 | -0.35 | -0.089 | 0.093 | 0.54 | 0.065 | 0.33 | 0.091 | 0.33 | -0.08 | 0.13 |
| WC |  |  | 1 | 0.2 | 0.29 | 0.24 | -0.0069 | -0.4 | -0.11 | 0.15 | 0.56 | 0.11 | 0.4 | 0.15 | 0.37 | -0.098 | 0.16 |
| SBP |  |  |  | 1 | 0.73 | 0.084 | 0.1 | -0.017 | 0.046 | 0.12 | 0.41 | 0.091 | 0.1 | 0.11 | 0.15 | -0.061 | 0.058 |
| DBP |  |  |  |  | 1 | 0.16 | 0.11 | -0.12 | 0.014 | 0.07 | 0.083 | 0.017 | 0.19 | 0.051 | 0.22 | -0.049 | 0.04 |
| TG |  |  |  |  |  | 1 | 0.36 | -0.32 | 0.14 | 0.2 | 0.043 | -0.038 | 0.23 | 0.13 | 0.81 | -0.012 | 0.11 |
| TC |  |  |  |  |  |  | 1 | 0.28 | 0.072 | 0.044 | -0.043 | -0.03 | 0.019 | 0.045 | 0.34 | 0.032 | 0.094 |
| HDL-C |  |  |  |  |  |  |  | 1 | -0.3 | -0.13 | -0.043 | -0.1 | -0.31 | -0.11 | -0.41 | 0.069 | -0.11 |
| LDL-C |  |  |  |  |  |  |  |  | 1 | 0.2 | 0.3 | -0.03 | -0.097 | 0.045 | -0.2 | 0.029 | 0.045 |
| FBG |  |  |  |  |  |  |  |  |  | 1 | -0.07 | -0.038 | -0.052 | 0.18 | 0.5 | -0.053 | 0.072 |
| METS score |  |  |  |  |  |  |  |  |  |  | 1 | 0.027 | 0.26 | 0.87 | 0.6 | -0.033 | 0.18 |
| Cr |  |  |  |  |  |  |  |  |  |  |  | 1 | 0.29 | -0.067 | 0.19 | -0.092 | -0.0027 |
| UA |  |  |  |  |  |  |  |  |  |  |  |  | 1 | -0.097 | 0.25 | -0.038 | 0.093 |
| HbA1c |  |  |  |  |  |  |  |  |  |  |  |  |  | 1 | 0.42 | -0.014 | 0.13 |
| TyG |  |  |  |  |  |  |  |  |  |  |  |  |  |  | 1 | -0.026 | 0.16 |
| Sleep quality |  |  |  |  |  |  |  |  |  |  |  |  |  |  |  | 1 | -0.023 |
| hs-CRP |  |  |  |  |  |  |  |  |  |  |  |  |  |  |  |  | 1 |

Abbreviations: BMI: Body mass index; WC: Waist circumference; SBP: Systolic blood pressure; DBP: Diastolic blood pressure; TC: Total cholesterol; TG: Triglycerides; HDL-C: High-density lipoprotein cholesterol; LDL-C: Low-density lipoprotein cholesterol; FBG: Fasting blood glucose; HbA1c: Glycosylated hemoglobin; Cr: Creatinine; UA: Blood uric acid; TyG: Triglyceride-glucose index; hs-CRP: High-sensitivity C-reactive protein.

Supplementary Table S7 Baseline characteristics of participants who have consistently been negative for MetS and those who have transitioned from being negative for MetS to being positive for MetS

|  | All participants | | P value | Males | | P value | Females | | P value |
| --- | --- | --- | --- | --- | --- | --- | --- | --- | --- |
|  | Stable MetS-negative (442) | Transition to MetS-positive (89) |  | Stable MetS-negative (325) | Transition to MetS-positive (76) |  | Stable MetS-negative (117) | Transition to MetS-positive (13) |  |
| Age (yr) | 44.00 (40.00-50.00) | 49.00 (45.00-54.00) | 0.239 | 52.00 (45.00-56.00) | 50.00 (45.00-55.00) | 0.061 | 47.00 (43.00-52.00) | 45.00 (43.00-50.25) | 0.887 |
| Smoking, n (%) | 325 (73.7) | 76 (85.4) | <0.001 |  |  |  |  |  |  |
| Drinking, n (%) | 95 (21.54) | 30 (33.7) | <0.001 | 91 (28) | 30 (39.47) | <0.001 | 4 (4.45) | 0 (0) | 0.206 |
| HBP, n (%) | 149 (33.79) | 34 (38.2) | 0.091 | 139 (39.7) | 33 (43.4) | 0.536 | 10 (8.62) | 1 (7.69) | 0.766 |
| DM, n (%) | 26 (5.90) | 9 (10.1) | 0.003 | 24 (7.38) | 7 (9.21) | 0.137 | 2 (1.72) | 2 (15.4) | <0.001 |
| Age (yr) | 13 (2.95) | 5 (5.62) | 0.03 | 11 (3.38) | 4 (5.26) | 0.178 | 2 (1.72) | 1 (7.69) | 0.025 |
| Medication history |  |  |  |  |  |  |  |  |  |
| Antihypertensive, n (%) | 29 (6.56) | 10 (11.24) | 0.195 | 9 (2.77) | 8 (10.53) | 0.01 | 20 (17.09) | 2 (15.38) | 0.481 |
| Antidiabetic, n (%) | 9 (2.04) | 5 (5.62) | 0.026 | 8 (2.46) | 4 (5.26) | 0.041 | 1 (0.85) | 1 (7.69) | 1 |
| Lipid-lowering drugs, n (%) | 9 (2.04) | 2 (2.25) | 0.727 | 9 (2.77) | 2 (2.63) | 0.75 | 0 (0) | 7 (53.85) | <0.001 |
| Metabolic index |  |  |  |  |  |  |  |  |  |
| BMI (kg/m2) | 21.(20.09-23.52) | 24.94 (23.58-26.94) | <0.001 | 24.13 (22.61-25.67) | 25.06 (23.90-27.20) | <0.001 | 21.78 (20.16-23.22) | 23.78 (21.50-23.77) | <0.001 |
| WC (cm) | 77.00 (71.00-8.003) | 89.00 (84.00-92.00) | <0.001 | 85.00 (81.00-89.00) | 90.00 (86.00-94.00) | <0.001 | 74.00 (70.00-78.00) | 77.00 (75.00-81.00) | <0.001 |
| SBP (mmHg) | 108.00 (101.00-116.00) | 125.00 (117.00-134.50) | <0.001 | 118.00 (110.00-126.50) | 124.00 (116.00-133.00) | <0.001 | 111.00 (103.00-120.75) | 132.50 (117.75-139.50) | <0.001 |
| DBP (mmHg) | 65.00 (65.00-72.00) | 80.00 (71.00-87.00) | <0.001 | 73.00 (67.00-81.00) | 80.00 (71.00-87.00) | <0.001 | 67.00 (62.00-73.00) | 84.00 (75.00-90.25) | <0.001 |
| TG (mmol/L) | 0.88 (0.69-1.18) | 1.72 (1.19-2.22) | <0.001 | 1.28 (0.92-1.75) | 1.73 (1.25-2.25) | <0.001 | 1 (0.77-1.37) | 1.47 (0.96-1.99) | <0.001 |
| TC (mmol/L) | 4.42 (3.88-4.96) | 5.03 (4.47-5.55) | 0.4 | 4.95 (4.41-5.49) | 4.98 (4.4-5.46) | 0.979 | 4.98 (4.43-5.69) | 5.41 (4.92-6.01) | 0.006 |
| HDL-C (mmol/L) | 1.19 (1.07-1.33) | 1.19 (1.07-1.35) | <0.001 | 1.28 (1.15-1.42) | 1.17 (1.06-1.31) | <0.001 | 1.54 (1.36-1.73) | 1.37 (1.19-1.48) | <0.001 |
| LDL-C (mmol/L) | 2.41 (2.00-2.95) | 2.93 (2.41-3.41) | 0.917 | 2.97 (2.43-3.43) | 2.89 (2.33-3.37) | 0.179 | 2.91 (2.36-3.51) | 3.27 (2.83-3.83) | 0.001 |
| Cr (µmol/L) | 66.00 (57.00-77.00) | 80 (68.50-89.00) | 0.107 | 82.00 (75.00-90.00) | 82 (74.00-91.00) | 0.448 | 60.00 (55.00-65.00) | 56.50 (51.00-64.25) | 0.033 |
| UA (µmol/L) | 295.00 (250-353) | 387.00 (339.5-445.5) | <0.001 | 377.00 (333-422) | 406.00 (358-452) | <0.001 | 274.00 (240.25-317) | 271.50 (235.75-325) | 0.822 |
| FBG (mmol/L) | 4.93 (4.65-5.22) | 5.52 (5.11-6.12) | <0.001 | 5.27 (4.98-5.62) | 5.54 (5.12-6.15) | <0.001 | 5.08 (4.82-5.33) | 5.29 (4.87-5.94) | 0.147 |
| HbA1c (%) | 5.30 (5.10-5.50) | 5.60 (5.40-6.00) | <0.001 | 5.50 (5.30-5.70) | 5.60 (5.40-6.00) | <0.001 | 5.40 (5.20-5.60) | 5.60 (5.48-5.90) | <0.001 |
| TyG | 0.82 (0.57-1.14) | 1.54 (1.24-1.80) | <0.001 | 1.23 (0.91-1.91) | 1.58 (1.28-1.82) | <0.001 | 0.92 (0.65-1.28) | 1.39 (1.02-1.66) | <0.001 |
| Biomarkers |  |  |  |  |  |  |  |  |  |
| hs-CRP (mg/L) | 0.60 (0.40-0.90) | 1.27 (0.80-2.49) | <0.001 | 0.97 (0.6-1.57) | 1.25 (0.80-2.47) | <0.001 | 0.77 (0.50-1.38) | 1.46 (0.80-2.57) | <0.001 |

Notes: MetS: Metabolic syndrome; HBP: Hypertension; DM: Diabetes mellitus; BMI: Body mass index; WC: Waist circumference; SBP: Systolic blood pressure; DBP: Diastolic blood pressure; TC: Total cholesterol; TG: Triglycerides; HDL-C: High-density lipoprotein cholesterol; LDL-C: Low-density lipoprotein cholesterol; FBG: Fasting blood glucose; HbA1c: Glycosylated hemoglobin; Cr: Creatinine; UA: Blood uric acid; TyG: Triglyceride-glucose index; hs-CRP: high-sensitivity C-reactive protein.

Supplementary Table S8 Comparison of baseline characteristics between participants included in the longitudinal analysis and those lost to follow-up among the baseline MetS-negative population

| Characteristic | Lost to follow-up (15051) | Included in longitudinal analysis (531) | P value |
| --- | --- | --- | --- |
| Age (years) | 46.51 (39.00-54.00) | 49.08 (44.00-54.00) | <0.001 |
| Sex (male), n (%) | 9783.00 (65.00) | 384.00 (72.32) | <0.001 |
| BMI (kg/m²) | 23.57 (21.64-25.33) | 23.68 (22.11-25.39) | 0.329 |
| WC (cm) | 81.54 (75.00-87.00) | 82.46 (77.00-88.00) | 0.13 |
| SBP(mmHg) | 119.19 (109.00-127.00) | 119.66 (110.00-127.00） | 0.481 |
| DBP(mmHg) | 73.35 (66.00-80.00) | 74.73 (67.00-82.00) | 0.003 |
| TG (mmol/L) | 1.50 (0.89-1.69) | 1.40 (0.92-1.68) | 0.005 |
| TC (mmol/L) | 5.01 (4.37-5.58) | 4.99 (4.39-5.58) | 0.694 |
| HDL-C (mmol/L) | 1.37 (1.17-1.53) | 1.37 (1.17-1.51) | 0.695 |
| LDL-C (mmol/L) | 2.92 (2.38-3.40) | 2.98 (2.47-3.49) | 0.060 |
| FBG(mmol/L) | 5.38 (4.90-5.51) | 5.39 (4.95-5.53) | 0.801 |
| Cr (µmol/L) | 74.23 (61.00-85.00) | 77.59 (67.00-87.00) | 0.001 |
| UA (µmol/L) | 338.93 (277.00-393.00) | 353.99 (294.00-407.00) | <0.001 |
| hs-CRP (mg/L) | 1.30 (0.60-1.70) | 1.04 (0.50-1.20) | 0.601 |
| HbA1c (%) | 5.56 (5.30-5.70) | 5.56 (5.30-5.60) | 0.834 |
| TyG | 1.22 (0.84-1.53) | 1.21 (0.87-1.54) | 0.465 |

Notes: MetS: Metabolic syndrome; BMI: Body mass index; WC: Waist circumference; SBP: Systolic blood pressure; DBP: Diastolic blood pressure; TC: Total cholesterol; TG: Triglycerides; HDL-C: High-density lipoprotein cholesterol; LDL-C: Low-density lipoprotein cholesterol; FBG: Fasting blood glucose; HbA1c: Glycosylated hemoglobin; Cr: Creatinine; UA: Blood uric acid; TyG: Triglyceride-glucose index; hs-CRP: high-sensitivity C-reactive protein.

Supplementary Table S9 Sensitivity analysis: results of multivariate logistic regression analysis on the association between hs-CRP and MetS after excluding extreme values

|  |  | Model 1 | | | Model 2 | | | Model 3 | | |
| --- | --- | --- | --- | --- | --- | --- | --- | --- | --- | --- |
|  |  | P value | OR | 95%CI for OR | P value | OR | 95%CI for OR | P value | OR | 95%CI for OR |
| All participants | hs-CRP | <0.001 | 1.600 | 1.551-1.651 | <0.001 | 1.569 | 1.516-1.624 | 0.024 | 1.065 | 1.008-1.125 |
| Man | hs-CRP | <0.001 | 1.568 | 1.512-1.627 | <0.001 | 1.538 | 1.477-1.602 | 0.031 | 1.076 | 1.008-1.149 |
| Woman | hs-CRP | <0.001 | 1.597 | 1.506-1.695 | <0.001 | 1.583 | 1.482-1.691 | 0.498 | 1.033 | 0.940-1.135 |

Notes: MetS: Metabolic syndrome; hs-CRP: high-sensitivity C-reactive protein.


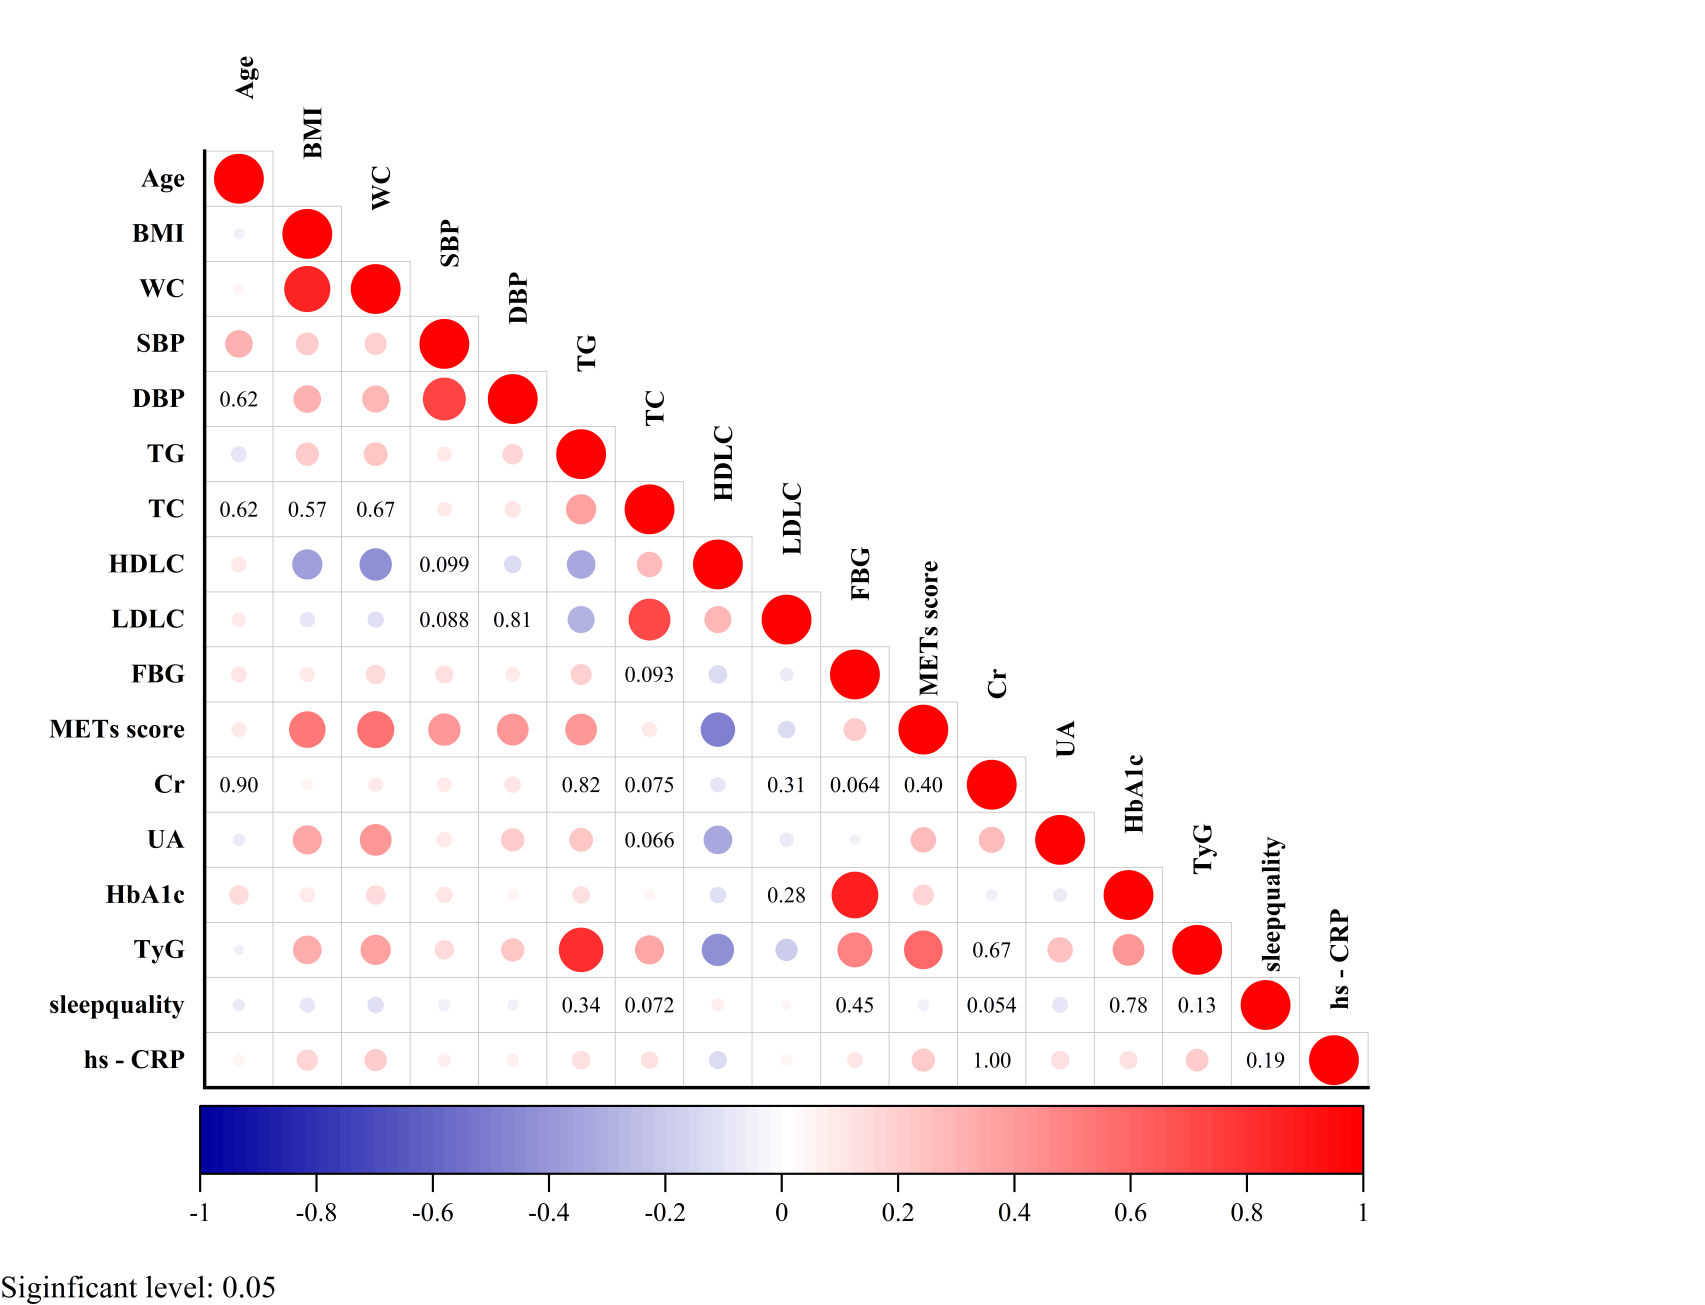


Figure S1 Spearman correlation matrix of hs-CRP biomarker and clinical variables

Abbreviations: MetS: Metabolic syndrome; BMI: Body mass index; SBP: Systolic blood pressure; DBP: Diastolic blood pressure; TC: Total cholesterol; TG: Triglycerides; HDL-C: High-density lipoprotein cholesterol; LDL-C: Low-density lipoprotein cholesterol; FBG: Fasting blood glucose; HbA1c: Glycosylated hemoglobin; Cr: Creatinine; UA: Blood uric acid; TyG: Triglyceride-glucose index; hs-CRP: high-sensitivity C-reactive protein.
